# Supplementary material for: ERMO3/MVP1/GOLD36 Is Involved in a Cell Type-Specific Mechanism for Maintaining ER Morphology in Arabidopsis thaliana
Source: PLOS journal article supplement (doi:10.1371/journal.pone.0049103), 2012-11-14
Supplement: S1 (10.1371/journal.pone.0049103.s001) [file journal.pone.0049103.s001]

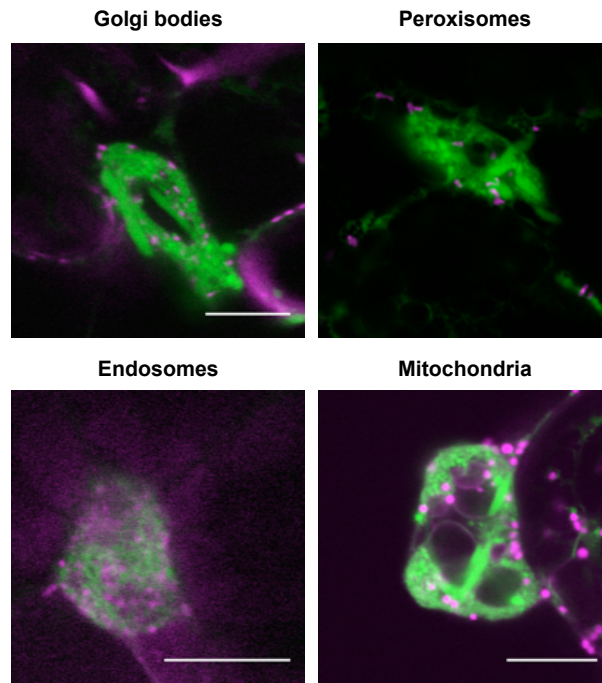

**Supplemental Figure 1.** The aggregates in *ermo3-1* include various organelles. Golgi bodies, peroxisomes, and endosomes were labeled with the transient expression of RFP-fused marker proteins KAM1 $\Delta$ C-mRFP, mRFP-PTS1, and Ara6-mRFP, respectively. Mitochondria were stained with MitoTracker Red CMRX. Bars, 10  $\mu$ m.
