# Supplementary material for: ERMO3/MVP1/GOLD36 Is Involved in a Cell Type-Specific Mechanism for Maintaining ER Morphology in Arabidopsis thaliana
Source: PLOS journal article supplement (doi:10.1371/journal.pone.0049103), 2012-11-14
Supplement: S5 (10.1371/journal.pone.0049103.s005) [file journal.pone.0049103.s005]

| SCORE | AGI code         | Gene name or annotations                                                                                                                        |
|-------|------------------|-------------------------------------------------------------------------------------------------------------------------------------------------|
| 922   | <b>At1g54010</b> | <b>GLL23</b>                                                                                                                                    |
| 856   | <b>At1g54030</b> | <b>ERMO3/MVP1/GOLD36</b>                                                                                                                        |
| 737   | <b>At1g54000</b> | <b>GLL22</b>                                                                                                                                    |
| 389   | <b>At3g16460</b> | <b>JAL34</b>                                                                                                                                    |
| 375   | <i>At4g28520</i> | <i>12S seed storage protein, putative / cruciferin, putative ((CRU3))</i>                                                                       |
| 345   | <i>At5g50600</i> | <i>short-chain dehydrogenase/reductase (SDR) family protein</i>                                                                                 |
| 252   | <b>At3g09260</b> | <b>PYK10/BGLU23</b>                                                                                                                             |
| 203   | <i>At4g27160</i> | <i>2S seed storage protein 3 / 2S albumin storage protein / NWMU2-2S albumin 3</i>                                                              |
| 199   | <i>At4g27150</i> | <i>2S seed storage protein 2 / 2S albumin storage protein / NWMU2-2S albumin 2</i>                                                              |
| 159   | <b>At3g16420</b> | <b>PBP1</b>                                                                                                                                     |
| 118   | <b>At3g14210</b> | <b>GLL65</b>                                                                                                                                    |
| 112   | <b>At1g58270</b> | <b>ZW9; MATH-domain containing protein</b>                                                                                                      |
| 111   | <i>At3g27660</i> | <i>glycine-rich protein / oleosin</i>                                                                                                           |
| 107   | <i>At1g20620</i> | <i>catalase 3 (SEN2) ((CAT3, SEN2))</i>                                                                                                         |
| 103   | <i>At3g01570</i> | <i>glycine-rich protein / oleosin</i>                                                                                                           |
| 87    | <i>At4g27170</i> | <i>2S seed storage protein 4 / 2S albumin storage protein / NWMU2-2S albumin 4</i>                                                              |
| 83    | <i>At3g26650</i> | <i>glyceraldehyde 3-phosphate dehydrogenase A, chloroplast (GAPA) / NADP-dependent glyceraldehydephosphate dehydrogenase subunit A ((GAPA))</i> |
| 78    | <i>At5g21274</i> | <i>calmodulin-6 (CAM6) ((CAM6))</i>                                                                                                             |
| 72    | <i>At1g49240</i> | <i>actin 8 (ACT8) ((ACT8))</i>                                                                                                                  |
| 72    | <i>At1g42970</i> | <i>glyceraldehyde-3-phosphate dehydrogenase B, chloroplast (GAPB) / NADP-dependent glyceraldehydephosphate dehydrogenase subunit B ((GAPB))</i> |
| 65    | <i>At4g28390</i> | <i>ADP, ATP carrier protein, mitochondrial, putative / ADP/ATP translocase, putative / adenine nucleotide translocator, putative ((AAC3))</i>   |
| 65    | <i>At5g13490</i> | <i>ADP, ATP carrier protein 2, mitochondrial / ADP/ATP translocase 2 / adenine nucleotide translocator 2 (ANT2) ((AAC2))</i>                    |
| 62    | <i>At1g17810</i> | <i>major intrinsic family protein / MIP family protein ((BETA-TIP))</i>                                                                         |
| 61    | <i>At4g35090</i> | <i>catalase 2 ((CAT2))</i>                                                                                                                      |
| 56    | <i>At1g31340</i> | <i>ubiquitin family protein ((RUB1))</i>                                                                                                        |
| 56    | <i>At5g54740</i> | <i>protease inhibitor/seed storage/lipid transfer protein (LTP) family protein</i>                                                              |
| 55    | <i>At1g03880</i> | <i>12S seed storage protein (CRB) ((CRU2))</i>                                                                                                  |
| 49    | <b>At1g54020</b> | <b>GLL24</b>                                                                                                                                    |
| 43    | <b>At3g20370</b> | <b>MATH-domain containing protein</b>                                                                                                           |
| 43    | <b>At3g21370</b> | <b>BGLU19</b>                                                                                                                                   |
| 43    | <b>At1g52400</b> | <b>BGLU18</b>                                                                                                                                   |
| 43    | <i>At5g44120</i> | <i>12S seed storage protein (CRA1) ((CRA1))</i>                                                                                                 |
| 39    | <i>At4g22010</i> | <i>multi-copper oxidase type I family protein</i>                                                                                               |
| 36    | <i>At1g48990</i> | <i>glycine-rich protein / oleosin</i>                                                                                                           |
| 35    | <i>At5g58510</i> | <i>expressed protein</i>                                                                                                                        |
| 32    | <i>At1g80450</i> | <i>VQ motif-containing protein</i>                                                                                                              |
| 30    | <i>At5g65950</i> | <i>expressed protein</i>                                                                                                                        |
| 29    | <i>At3g21000</i> | <i>expressed protein</i>                                                                                                                        |
| 28    | <i>At5g45520</i> | <i>hypothetical protein</i>                                                                                                                     |
| 28    | <i>At2g16640</i> | <i>chloroplast outer membrane protein, putative</i>                                                                                             |
| 28    | <i>At1g77280</i> | <i>protein kinase family protein</i>                                                                                                            |
| 28    | <i>At4g15830</i> | <i>expressed protein</i>                                                                                                                        |
| 28    | <i>At5g23060</i> | <i>expressed protein</i>                                                                                                                        |
| 27    | <i>At2g40690</i> | <i>NAD-dependent glycerol-3-phosphate dehydrogenase family protein ((SFD1))</i>                                                                 |
| 27    | <i>At5g02570</i> | <i>histone H2B, putative</i>                                                                                                                    |
| 27    | <i>At1g59980</i> | <i>DNAJ heat shock N-terminal domain-containing protein</i>                                                                                     |
| 27    | <i>At1g73360</i> | <i>homeobox-leucine zipper family protein / lipid-binding START domain-containing protein</i>                                                   |
| 27    | <i>At2g19240</i> | <i>RabGAP/TBC domain-containing protein</i>                                                                                                     |
| 26    | <i>At3g63390</i> | <i>expressed protein</i>                                                                                                                        |
| 26    | <i>At1g73450</i> | <i>protein kinase, putative</i>                                                                                                                 |
| 26    | <i>At5g61160</i> | <i>transferase family protein</i>                                                                                                               |
| 26    | <i>At3g01020</i> | <i>iron-sulfur cluster assembly complex protein, putative</i>                                                                                   |
| 26    | <i>At5g35980</i> | <i>protein kinase family protein</i>                                                                                                            |
| 26    | <i>At2g13640</i> | <i>Golgi GDP mannose transporter (GONST1)</i>                                                                                                   |
| 25    | <i>At3g44050</i> | <i>kinesin motor protein-related</i>                                                                                                            |
| 25    | <i>At5g18820</i> | <i>chaperonin, putative</i>                                                                                                                     |
| 25    | <i>At4g31240</i> | <i>expressed protein</i>                                                                                                                        |
| 25    | <i>At3g19270</i> | <i>cytochrome P450 family protein ((CYP707A4))</i>                                                                                              |
| 24    | <i>At2g44410</i> | <i>expressed protein</i>                                                                                                                        |
| 24    | <i>At1g48920</i> | <i>nucleolin, putative</i>                                                                                                                      |
| 24    | <i>At2g37430</i> | <i>zinc finger (C2H2 type) family protein (ZAT11)</i>                                                                                           |
| 24    | <i>At1g19140</i> | <i>expressed protein</i>                                                                                                                        |
| 23    | <i>At3g13880</i> | <i>pentatricopeptide (PPR) repeat-containing protein</i>                                                                                        |
| 22    | <i>At5g14970</i> | <i>expressed protein</i>                                                                                                                        |
| 22    | <i>At5g18510</i> | <i>hypothetical protein</i>                                                                                                                     |
| 22    | <i>At5g16020</i> | <i>stress protein-related</i>                                                                                                                   |
| 21    | <i>At4g19230</i> | <i>cytochrome P450 family protein ((CYP707A1))</i>                                                                                              |
| 20    | <i>At5g20350</i> | <i>zinc finger (DHHC type) family protein / ankyrin repeat family protein</i>                                                                   |
| 19    | <i>At5g20140</i> | <i>SOUL heme-binding family protein</i>                                                                                                         |
| 19    | <i>At1g13610</i> | <i>expressed protein</i>                                                                                                                        |
| 19    | <i>At1g51480</i> | <i>disease resistance protein (CC-NBS-LRR class), putative</i>                                                                                  |
| 19    | <i>At1g06470</i> | <i>phosphate translocator-related</i>                                                                                                           |
| 18    | <i>At3g06620</i> | <i>protein kinase family protein</i>                                                                                                            |
| 17    | <i>At2g43760</i> | <i>molybdopterin biosynthesis MoaE family protein</i>                                                                                           |
| 16    | <i>At1g64670</i> | <i>hydrolase, alpha/beta fold family protein</i>                                                                                                |
| 14    | <i>At4g15210</i> | <i>beta-amylase (BM1) / 1,4-alpha-D-glucan maltohydrolase ((ATBETA-AMY, RAM1))</i>                                                              |

**Supplemental Table 1.** ERMO3/MVP1/GOLD36-interacting proteins identified by anti-HA pull-down followed by mass spectrometry. Proteins present in anti-HA precipitates from ERMO3-HA were identified by LTQ-Orbitrap mass spectrometry. Proteins also identified in anti-HA precipitates from non-transgenic CS60000 were excluded. Arabidopsis Genome Initiative (AGI) codes and annotations were obtained from the TAIR website (<http://www.Arabidopsis.org/>) and the ATTED-II website (<http://atted.jp>). Scores were calculated using Mascot software.
